# Supplementary material for: Use and cost of disease-modifying therapies by Sonya Slifka Study participants: has anything really changed since 2000 and 2009?
Source: PubMed Central journal article supplement — Mult Scler J Exp Transl Clin. 2019 Feb 20;5(1):2055217318820888. doi: 10.1177/2055217318820888 (PMC6385335; doi:10.1177/2055217318820888), 2019-02-20
Supplement: Supplemental_Material.pdf [file Supplemental_Material.pdf]

**Online Table 1. Use of disease modifying therapies by demographic and clinical characteristics in 2000 and 2009 at time of interview <sup>a</sup>**

|                         | <b>2000 users</b><br><i>(n = 1,193)</i><br><b>(55.3% of sample of 2,156)</b> | <b>2009 users</b><br><i>(n=1,651)</i><br><b>(70.0% of sample of 2,361)</b> |
|-------------------------|------------------------------------------------------------------------------|----------------------------------------------------------------------------|
| <b>Characteristics</b>  | <b>n (%)</b>                                                                 | <b>n (%)</b>                                                               |
| Male                    | 242 (20.3)                                                                   | 336 (20.4)                                                                 |
| Female                  | 951 (79.7)                                                                   | 1,315 (79.6)                                                               |
| <b>Age, years</b>       |                                                                              |                                                                            |
| 18-34                   | 150 (12.6)                                                                   | 121 (7.3)                                                                  |
| 35-44                   | 362 (30.3)                                                                   | 296 (17.9)                                                                 |
| 45-54                   | 447 (37.5)                                                                   | 531 (32.2)                                                                 |
| 55-64                   | 203 (17.0)                                                                   | 543 (32.9)                                                                 |
| 65-74                   | 26 (2.2)                                                                     | 141 (8.5)                                                                  |
| 75+                     | 5 (0.4)                                                                      | 17 (1.0)                                                                   |
| <b>Race</b>             |                                                                              |                                                                            |
| White                   | 1,036 (86.8)                                                                 | 1,430 (86.6)                                                               |
| African-American        | 59 (4.9)                                                                     | 129 (7.8)                                                                  |
| Other                   | 40 (3.4)                                                                     | 33 (2.0)                                                                   |
| Multiple Races          | NA                                                                           | 40 (2.4)                                                                   |
| <b>Ethnicity</b>        |                                                                              |                                                                            |
| Non-Hispanic            | 1,135 (95.1)                                                                 | 1,554 (94.1)                                                               |
| Hispanic                | 56 (4.7)                                                                     | 95 (5.8)                                                                   |
| <b>Marital status</b>   |                                                                              |                                                                            |
| Married/Living together | 798 (66.9)                                                                   | 1,194 (72.3)                                                               |
| Widowed                 | 30 (2.5)                                                                     | 61 (3.7)                                                                   |
| Divorced/Separated      | 198 (16.6)                                                                   | 215 (13.0)                                                                 |
| Never married           | 166 (13.9)                                                                   | 180 (10.9)                                                                 |

**Online Table 1. Use of disease modifying therapies by demographic and clinical characteristics in 2000 and 2009 at time of interview <sup>a</sup>**

|                                       | <b>2000 users</b><br><i>(n = 1,193)</i><br><b>(55.3% of sample of 2,156)</b> | <b>2009 users</b><br><i>(n=1,651)</i><br><b>(70.0% of sample of 2,361)</b> |
|---------------------------------------|------------------------------------------------------------------------------|----------------------------------------------------------------------------|
| <b>Characteristics</b>                | <b>n (%)</b>                                                                 | <b>n (%)</b>                                                               |
| <b>Education</b>                      |                                                                              |                                                                            |
| High school graduate or less          | 292 (24.5)                                                                   | 282 (17.1)                                                                 |
| Some college/nursing degree           | N/A                                                                          | 499 (30.2)                                                                 |
| College graduate                      | 690 (57.8)                                                                   | 491 (29.7)                                                                 |
| Post graduate                         | 194 (16.3)                                                                   | 377 (22.8)                                                                 |
| <b>Employment status</b>              |                                                                              |                                                                            |
| Employed                              | 681 (57.1)                                                                   | 710 (43.0)                                                                 |
| Unemployed                            | 510 (42.7)                                                                   | 941 (57.0)                                                                 |
| <b>Family income, \$ <sup>b</sup></b> |                                                                              |                                                                            |
| <25,000                               | 185 (15.5)                                                                   | 238 (14.4)                                                                 |
| 25,000 - <50,000                      | 344 (28.8)                                                                   | 314 (19.0)                                                                 |
| 50,000 - <75,000                      | 628 (52.6)                                                                   | 977 (59.2)                                                                 |
| 75,000 - <100,000                     |                                                                              |                                                                            |
| 100,000+                              |                                                                              |                                                                            |
| <b>Census region</b>                  |                                                                              |                                                                            |
| Northeast                             | 310 (26.0)                                                                   | 436 (26.4)                                                                 |
| Midwest                               | 293 (24.6)                                                                   | 442 (26.8)                                                                 |
| South                                 | 308 (25.8)                                                                   | 412 (25.0)                                                                 |
| West                                  | 282 (23.6)                                                                   | 361 (21.9)                                                                 |
| <b>Urban/rural status</b>             |                                                                              |                                                                            |
| Urban                                 | 1,005 (84.2)                                                                 | 1367 (82.8)                                                                |
| Rural                                 | 188 (15.8)                                                                   | 284 (17.2)                                                                 |

**Online Table 1. Use of disease modifying therapies by demographic and clinical characteristics in 2000 and 2009 at time of interview <sup>a</sup>**

|                                           | <b>2000 users</b><br><i>(n = 1,193)</i><br><b>(55.3% of sample of 2,156)</b> | <b>2009 users</b><br><i>(n=1,651)</i><br><b>(70.0% of sample of 2,361)</b> |
|-------------------------------------------|------------------------------------------------------------------------------|----------------------------------------------------------------------------|
| <b>Characteristics</b>                    | <b>n (%)</b>                                                                 | <b>n (%)</b>                                                               |
| <b>Health insurance coverage</b>          |                                                                              |                                                                            |
| Yes                                       | 1167 (98.2)                                                                  | 1619 (98.1)                                                                |
| No                                        | 26 (1.8)                                                                     | 32 (1.9)                                                                   |
| <b>Health insurance type <sup>c</sup></b> |                                                                              |                                                                            |
| Private only                              | NA                                                                           | 944 (57.2)                                                                 |
| Medicare only                             | NA                                                                           | 102 (6.2)                                                                  |
| Other public only                         | NA                                                                           | 112 (6.8)                                                                  |
| Mixed coverage                            | NA                                                                           | 457 (27.7)                                                                 |
| Uninsured                                 | 26 (1.2)                                                                     | 32 (1.9)                                                                   |
| <b>Course</b>                             |                                                                              |                                                                            |
| Relapsing-remitting                       | 834 (69.9)                                                                   | 1165 (70.6)                                                                |
| Secondary progressive                     | 220 (18.4)                                                                   | 330 (20.0)                                                                 |
| Primary progressive                       | 90 (7.5)                                                                     | 84 (5.1)                                                                   |
| Progressive-relapsing                     | 38 (3.2)                                                                     | 60 (3.6)                                                                   |
| <b>Duration since diagnosis, years</b>    |                                                                              |                                                                            |
| 1-5                                       | 627 (52.6)                                                                   | 391 (23.7)                                                                 |
| 6-10                                      | 408 (34.2)                                                                   | 472 (28.6)                                                                 |
| 11-15                                     |                                                                              | 277 (74.3)                                                                 |
| 16-20                                     | 158 (13.2)                                                                   | 202 (57.9)                                                                 |
| 20+                                       |                                                                              | 308 (49.4)                                                                 |
| <b>Relapses in past year <sup>d</sup></b> |                                                                              |                                                                            |
| 0                                         | 645 (54.1)                                                                   | 943 (57.1)                                                                 |

**Online Table 1. Use of disease modifying therapies by demographic and clinical characteristics in 2000 and 2009 at time of interview <sup>a</sup>**

|                                                                                | <b>2000 users</b><br><b>(n = 1,193)</b><br><b>(55.3% of sample of 2,156)</b> | <b>2009 users</b><br><b>(n=1,651)</b><br><b>(70.0% of sample of 2,361)</b> |
|--------------------------------------------------------------------------------|------------------------------------------------------------------------------|----------------------------------------------------------------------------|
| <b>Characteristics</b>                                                         | <b>n (%)</b>                                                                 | <b>n (%)</b>                                                               |
| 1                                                                              | 423 (35.5)                                                                   | 601 (36.4)                                                                 |
| 2                                                                              |                                                                              |                                                                            |
| 3-4                                                                            | 92 (7.7)                                                                     | 63 (3.8)                                                                   |
| 5+                                                                             | 33 (2.8)                                                                     | 17 (1.0)                                                                   |
| <b>Disability status <sup>e</sup></b>                                          |                                                                              |                                                                            |
| No MS symptoms                                                                 | 608 (51.0)                                                                   | 863 (52.3)                                                                 |
| Mild MS symptoms with no limitations on activity or<br>Non-ambulatory symptoms |                                                                              |                                                                            |
| Trouble walking but no aid used                                                | 136 (11.4)                                                                   | 146 (8.8)                                                                  |
| Can walk 25 feet without a cane                                                | 122 (10.2)                                                                   | 176 (10.7)                                                                 |
| Cannot walk 25 feet without a cane                                             | 169 (14.2)                                                                   | 206 (12.5)                                                                 |
| Cannot walk 25 feet without bilateral support                                  | 61 (5.1)                                                                     | 127 (7.7)                                                                  |
| Requires wheelchair or scooter                                                 | 94 (7.9)                                                                     | 129 (7.8)                                                                  |
| Completely bedridden                                                           | 0 (0.0)                                                                      | 4 (0.2)                                                                    |

**Online Table 1. Use of disease modifying therapies by demographic and clinical characteristics in 2000 and 2009 at time of interview <sup>a</sup>**

|                        | <b>2000 users</b><br><i>(n = 1,193)</i><br><b>(55.3% of sample of 2,156)</b> | <b>2009 users</b><br><i>(n=1,651)</i><br><b>(70.0% of sample of 2,361)</b> |
|------------------------|------------------------------------------------------------------------------|----------------------------------------------------------------------------|
| <b>Characteristics</b> | <b>n (%)</b>                                                                 | <b>n (%)</b>                                                               |

<sup>a</sup> Demographic and disease characteristics reflect status at the time of interview. DMT use in 2000 reflects status at the time of interview and in 2009 covers the entire recall period.

<sup>b</sup> Total combined income before taxes of all family members and from all sources during previous calendar year, including money from jobs, net income from business, farm or rent, pensions, dividends, interest, social security, retirement income, disability insurance, unemployment payments, public assistance, etc.

<sup>c</sup> Health insurance types: “Private only” includes commercial, Tricare, American Association of Retired Persons, drug plans; “Other public only” includes any public insurance except Medicare, i.e. Medicaid, General Medical Assistance, Veterans Health Administration, Indian Health Service, Workers Compensation, other government plan; “Mixed coverage” includes any combination of private plus public insurance.

<sup>d</sup> Standardized to a 12-month recall period.

<sup>e</sup> Source: Hohol MJ, Orav EJ, Weiner HL. Disease steps in multiple sclerosis: a simple approach to evaluate disease progression. *Neurology*. 1995;45:251-255. Based on free text responses from previous waves of Slifka study interviews, ‘no MS symptoms’ and ‘completely bedridden’ were added. “Non-ambulatory symptoms” include “sensory abnormalities”, “bladder impairment”, “incoordination”, “weakness”, or “fatigue” of any severity.
